# Supplementary material for: Pre- and peri-natal hurricane exposure alters DNA methylation patterns in children
Source: PubMed Central journal article supplement (PMC9995354; doi:10.1038/s41598-023-30645-5), 2023-03-08
Supplement: 41598_2023_30645_MOESM1_ESM.pdf [file 41598_2023_30645_MOESM1_ESM.pdf]

# Supplementary Materials

1  
2  
3  
4  
5  
6  
7  
8  
9  
10  
11  
12  
13  
14  
15  
16  
17

**Title: Pre- and peri-natal hurricane exposure alters DNA methylation patterns in children**

**Authors:** Erin Kello<sup>1†</sup>, Alexandre R. Vieira<sup>1†</sup>, Sona Rivas-Tumanyan<sup>2</sup>, Maribel Campos-Rivera<sup>2</sup>, Karen G. Martinez-Gonzalez<sup>2‡</sup>, Carmen J. Buxó<sup>2‡</sup>, Evangelia Morou-Bermúdez<sup>2\*‡</sup>

**Affiliations:**

- <sup>1</sup>University of Pittsburgh, Pittsburgh, USA
- <sup>2</sup>University of Puerto Rico Medical Sciences Campus, San Juan, Puerto Rico
- \*Corresponding author. Email: [evangelia.morou@upr.edu](mailto:evangelia.morou@upr.edu)

<sup>†</sup>These authors contributed equally to this work  
<sup>‡</sup>These authors contributed equally to this work

**This PDF file includes:**

- Supplemental Table 1
- Supplemental Figs. S1 to S8

| Chromosome # | Adjusted p-value | ProbeID    | Associated Variable                              |
|--------------|------------------|------------|--------------------------------------------------|
| 1            | 0.046249494      | cg26872588 | PNMS                                             |
| 1            | 0.046249494      | cg15324917 | PNMS                                             |
| 10           | 0.006525317      | cg05279086 | PNMS                                             |
| 14           | 0.006043768      | cg08182193 | PNMS                                             |
| 3            | 0.006882115      | cg16989784 | PTSD (yes/no)                                    |
| 10           | 0.0047026        | cg05279086 | PTSD (yes/no)                                    |
| 10           | 0.048871044      | cg26212957 | PTSD (yes/no)                                    |
| 9            | 0.004214734      | cg23727518 | Total PHQ , categorical                          |
| 9            | 0.006114372      | cg26804081 | Total PHQ , categorical                          |
| 14           | 0.001043277      | cg08182193 | Total PHQ , categorical                          |
| 16           | 0.013815236      | cg19712499 | Total PHQ , categorical                          |
| 17           | 0.009862924      | cg02238950 | Total PHQ , categorical                          |
| 1            | 0.042049482      | cg26838150 | Total PSS score, categorical                     |
| 1            | 0.017017733      | cg26295681 | Total PSS score, categorical                     |
| 6            | 0.021913176      | cg19727175 | Total PSS score, categorical                     |
| 9            | 0.003805376      | cg26089861 | Total PSS score, categorical                     |
| 12           | 0.042480243      | cg15289144 | Total PSS score, categorical                     |
| 1            | 0.005211791      | cg16829732 | Gestational age in weeks on the day of hurricane |
| 1            | 0.003632701      | cg18118503 | Gestational age in weeks on the day of hurricane |
| 1            | 0.000492672      | cg26117431 | Gestational age in weeks on the day of hurricane |
| 1            | 0.000492672      | cg12187169 | Gestational age in weeks on the day of hurricane |
| 1            | 0.000492672      | cg25754465 | Gestational age in weeks on the day of hurricane |
| 1            | 0.000492672      | cg21821887 | Gestational age in weeks on the day of hurricane |
| 1            | 0.002309302      | cg11819621 | Gestational age in weeks on the day of hurricane |
| 12           | 0.005842253      | cg20527049 | Gestational age in weeks on the day of hurricane |
| 12           | 0.017561291      | cg17314520 | Gestational age in weeks on the day of hurricane |
| 14           | 0.025564923      | cg10257671 | Gestational age in weeks on the day of hurricane |
| 15           | 0.015077976      | cg01096911 | Gestational age in weeks on the day of hurricane |
| 16           | 0.009202219      | cg16470259 | Gestational age in weeks on the day of hurricane |
| 17           | 0.017946672      | cg06360796 | Gestational age in weeks on the day of hurricane |
| 18           | 0.037704169      | cg17550693 | Gestational age in weeks on the day of hurricane |
| 2            | 0.000434922      | cg05964953 | Gestational age in weeks on the day of hurricane |
| 2            | 0.001683356      | cg09330016 | Gestational age in weeks on the day of hurricane |
| 2            | 0.012861248      | cg10477905 | Gestational age in weeks on the day of hurricane |
| 2            | 3.19463E-05      | cg03756139 | Gestational age in weeks on the day of hurricane |
| 20           | 0.033190677      | cg06815737 | Gestational age in weeks on the day of hurricane |
| 3            | 0.005112541      | cg26296470 | Gestational age in weeks on the day of hurricane |
| 3            | 0.020803831      | cg09929707 | Gestational age in weeks on the day of hurricane |
| 3            | 0.022048001      | cg13062105 | Gestational age in weeks on the day of hurricane |
| 4            | 0.007475603      | cg03539481 | Gestational age in weeks on the day of hurricane |
| 4            | 0.002829573      | cg17472483 | Gestational age in weeks on the day of hurricane |

|   |             |            |                                                  |
|---|-------------|------------|--------------------------------------------------|
| 6 | 0.008502083 | cg12674490 | Gestational age in weeks on the day of hurricane |
| 6 | 0.01118811  | cg14815329 | Gestational age in weeks on the day of hurricane |
| 6 | 0.018835431 | cg27270451 | Gestational age in weeks on the day of hurricane |
| 6 | 0.007962797 | cg21078322 | Gestational age in weeks on the day of hurricane |
| 9 | 9.70465E-05 | cg14041232 | Gestational age in weeks on the day of hurricane |
| 9 | 3.09616E-05 | cg09187598 | Gestational age in weeks on the day of hurricane |

18  
19  
20  
21

Supplemental Table 1: Significant differentially methylated single probes (DMPs) associated with all hurricane-related variables tested.

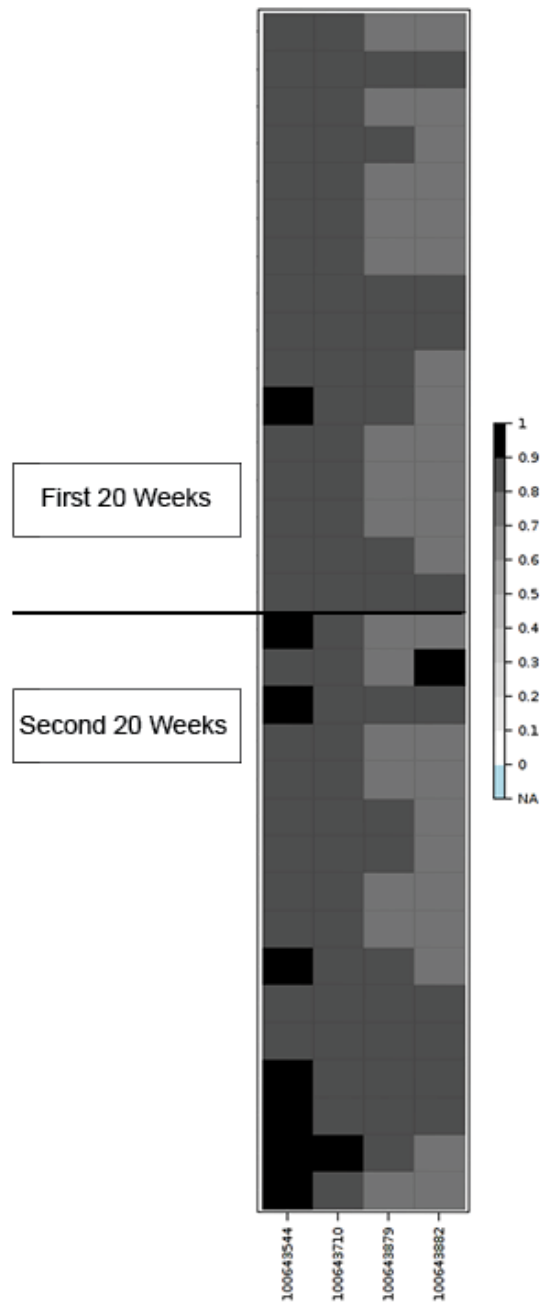

22

23 Supplemental Fig.S1 CoMET Heatmap of the four probes associated with the *LLRC39* DMR. Y-

24 axis = by sample with designation of gestational time at the time of Hurricane Maria, 1=1<sup>st</sup> 20

25 weeks, 2= 2<sup>nd</sup> 20 weeks. X-axis = Probe ID. Darker colors indicate higher methylation levels.

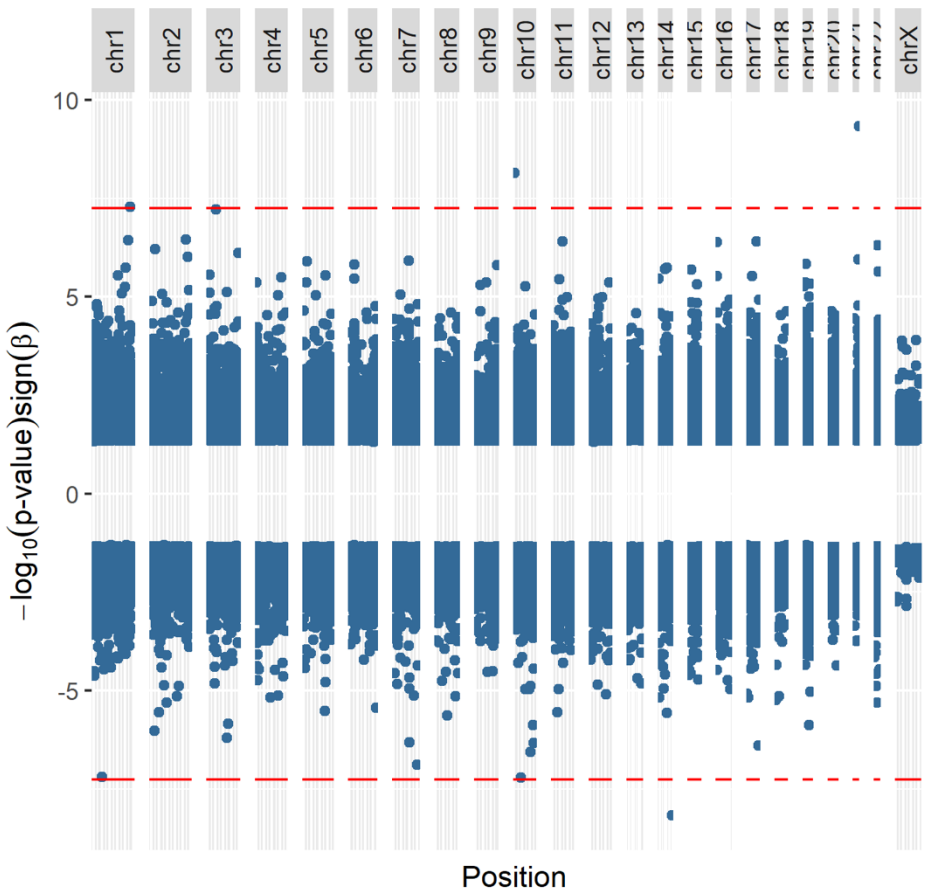

26

27 Supplemental Fig. S2 Manhattan plot of significant CpG sites associated with PNMS

28 (yes/no). Red lines represent FDR significance threshold.

29

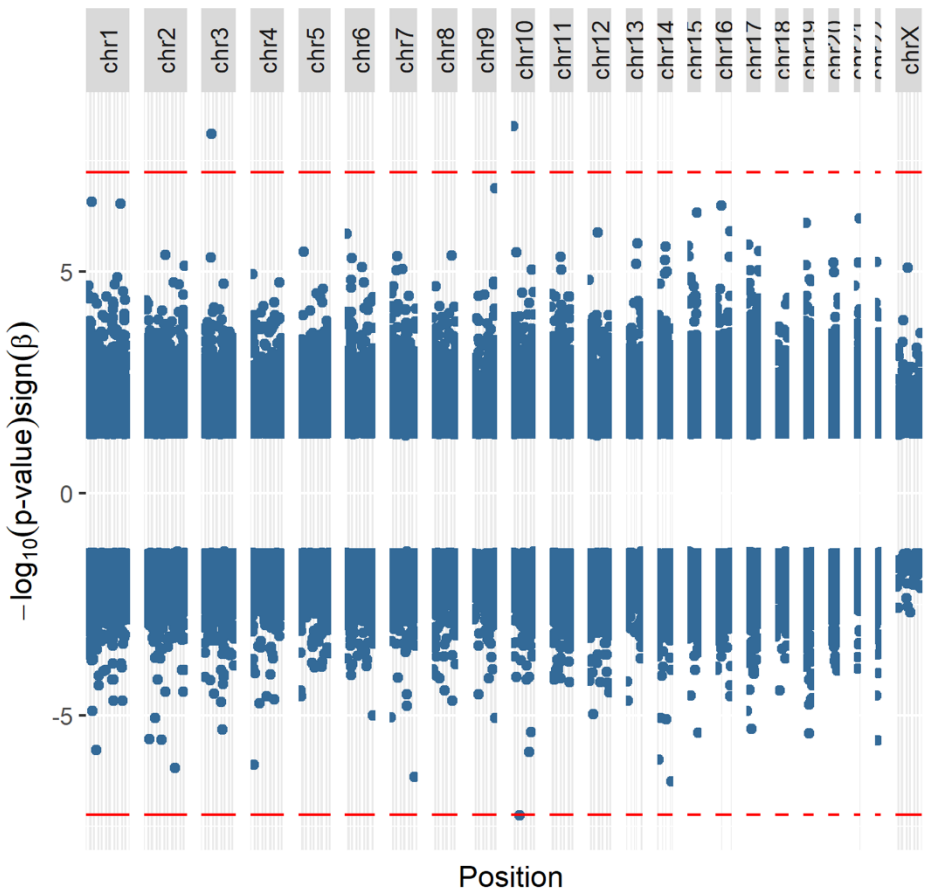

31

32

33 Supplemental Fig. S3 Manhattan plot of significant CpG sites associated with PTSD symptoms

34 (yes/no). Red lines represent FDR significance threshold.

35

36

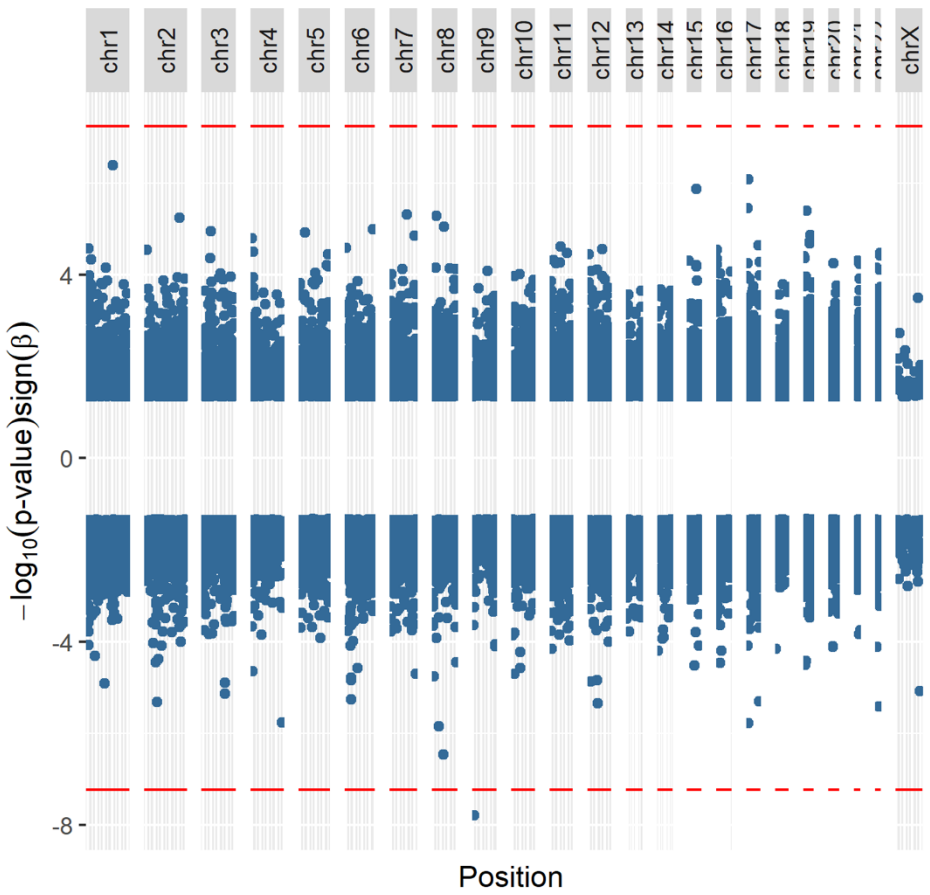

37

38

39 Supplemental Fig. S4 Manhattan plot of significant CpG sites associated with property damage

40 score. Red lines represent FDR significance threshold.

41

42

43

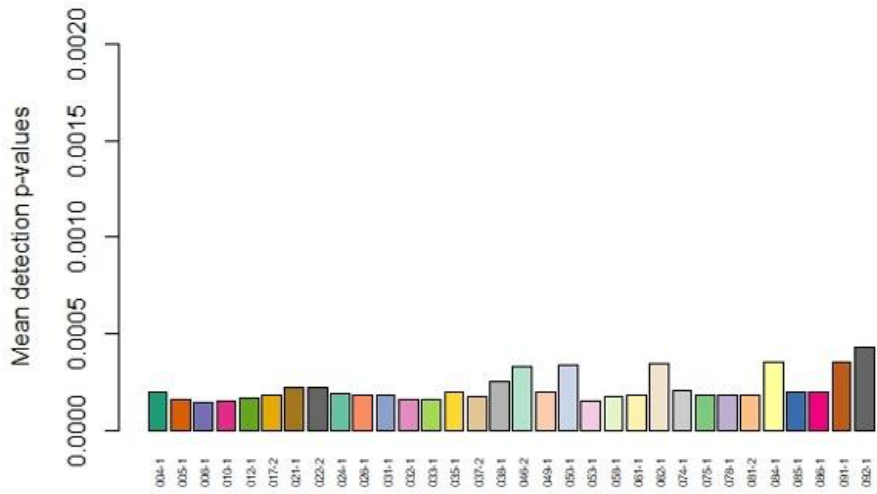

44

45

Supplemental Fig. S5 Mean detection p-values for all samples by number.

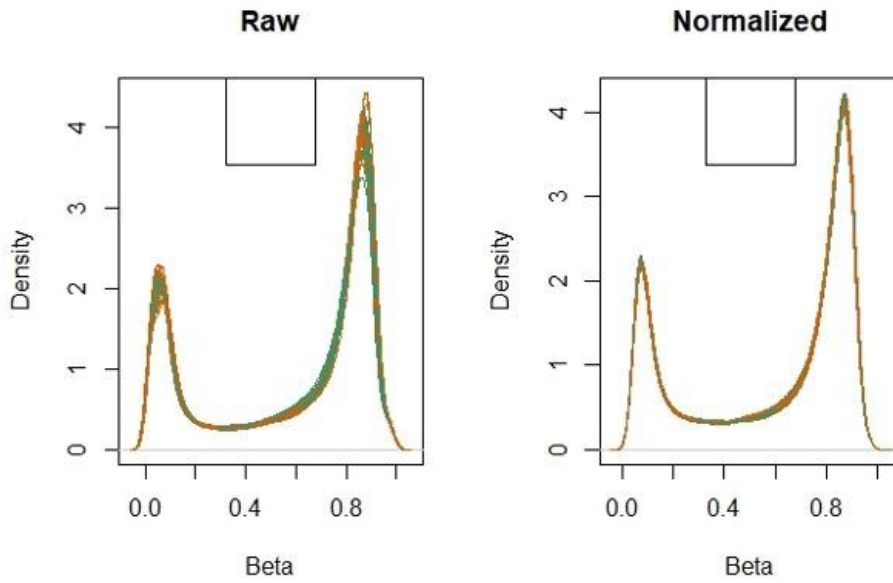

46

47

Supplemental Fig. S6. Density plots before and after normalization.

48



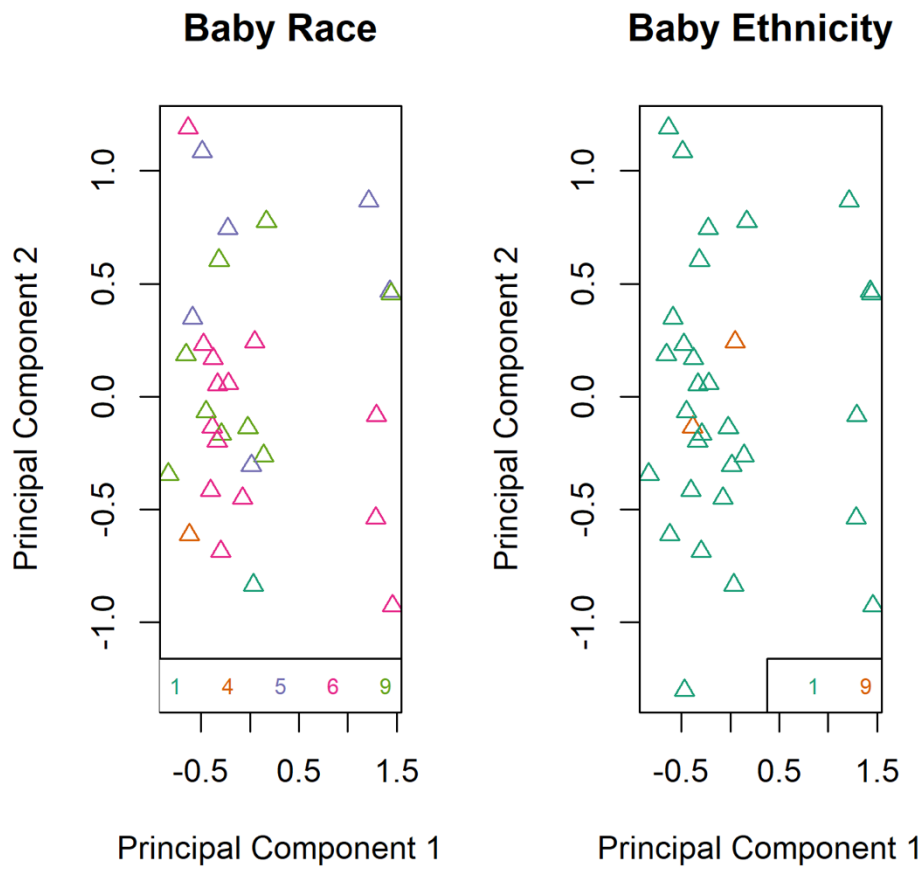

49

50 Supplemental Fig. S7 MDS plots of subjects by race and ethnicity. **Race plot:** 1: American

51 Indian / Alaska Native; 4: Black/African American; 5: White/Caucasian; 6: More than 1 race; 9:

52 Don't know/no response. **Ethnicity plot:** 1: Hispanic or Latino; 9: Don't know / No response.

53

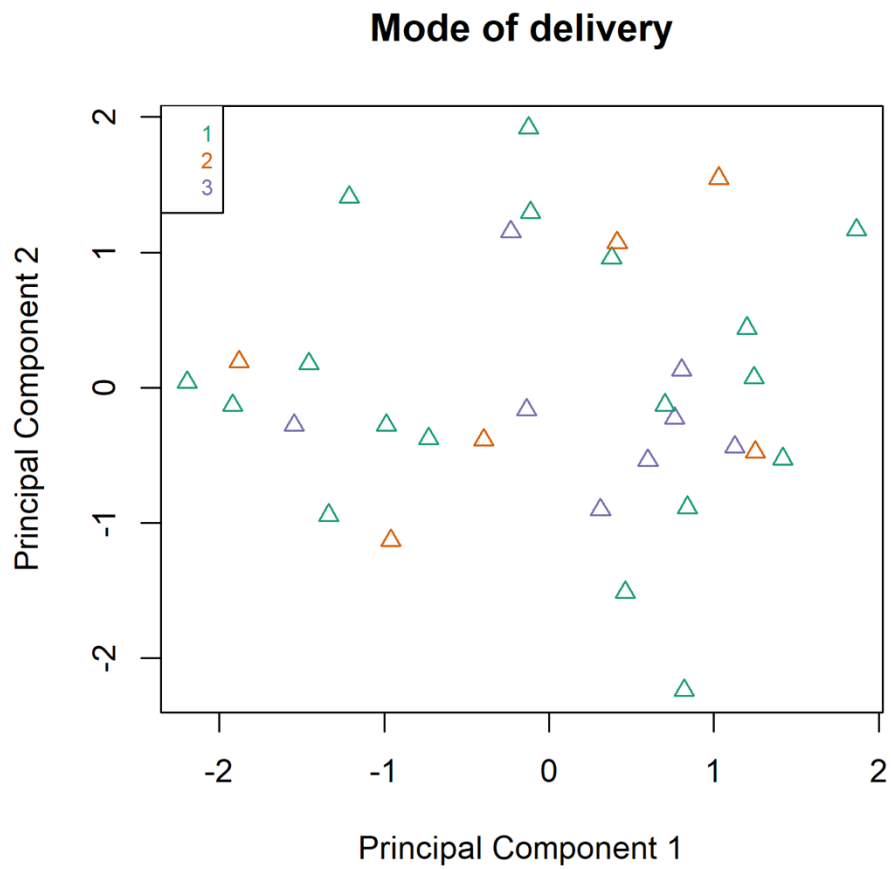

54

55 Supplemental Fig. S8. MDS plot of mode of delivery: 1: Vaginal delivery; 2: C-section,

56 scheduled; 3: C-section, unscheduled.

57
